# Supplementary material for: Mucinous adenocarcinoma, gastric type of the uterine cervix: clinical features and HER2 amplification
Source: Springer Nature journal article supplement (doi:10.1007/s00795-018-0202-2), 2018-07-10
Supplement: MOESM1 [file 15942162]

**Supplementary Table 1**

Treatments, regimen of chemotherapy, and therapeutic effect in gastric type mucinous adenocarcinoma (GAS) patients

| **Case** | **FIGO**  **Stage** | **Neoadjuvant**  **chemotherapy** | **Surgery** | **1st**  **chemotherapy** | **2nd**  **chemotherapy** | **3rd**  **chemotherapy** | **4th**  **chemotherapy** | **Prognosis,**  **OS (months)** |
| --- | --- | --- | --- | --- | --- | --- | --- | --- |
| **1** | IB1 |  | RH/BSO/PeN/OM/  Appendectomy/peritoneal stripping | TC 6 cycles | - | - | - | DOD, 49M |
| **2** | IB1 |  | Semi-RH/BS | - | - | - | - | NED, 8M |
| **3** | IB1 |  | RH/BSO/PeN/PAN | TC 6 cycles | - | - | - | NED, 66M |
| **4** | IB2 |  | RH/BSO/PeN/PAN/OM/  peritoneal stripping | TC 3 cycles | S-1/CDDP 3 cycles  (SD) | CDDP 3 cycles  (PD) | - | DOD, 15M |
| **5** | IB2 |  | RH/BSO/PeN/PAN/  Bladder partial resection | - | - | - | - | NED, 46M |
| **6** | IB2 | TP 2 cycles  (SD: 20%) | RH/BSO/PeN/PAN | TP 4 cycles | - | - | - | NED, 30M |
| **7** | IIB |  | RH/BSO/PeN/PAN/  left ureter and bladder partial resection | TC 5 cycles  (PD) | CPT-11/NDP 8 cycles  (PD) | GEM 9 cycles  (PD) | Radiation | DOD, 32M |
| **8** | IIB |  | RH/BSO/PeN/PAN/  disseminated tumor resection | TC 6 cycles  (PD) | S-1 6 cycles  (SD) | - | - | AWD, 25M |
| **9** | IIB | TP 2 cycles  (SD: 25%) | RH/BSO/PeN/PAN/partial OM | S-1/CPT11 5 cycles | - | - | - | NED, 12M |
| **10** | IIB |  | RH/BSO/PEN | TC 6 cycles  (PD) | CPT11/NDP 3 cycles  (PD) | CCRT (CDDP 5 cycles)  (PD) | - | DOD, 20M |
| **11** | IIIA |  | - | TC 6 cycles  (PD) | S-1 7 cycles  (SD) | - | - | AWD, 17M |
| **12** | IIIB |  | - | CCRT  (PD) | TC 3 cycles  (PD) | CPT11/CDDP 2 cycles  (PD) | GEM 1 cycles | DOD, 12M |
| **13** | IVA | Surgery | Anterior pelvic exenteration/  PeN/PAN | TC 6 cycles | - | - | - | NED, 9M |

Abbreviations

NAC: neoadjuvant chemotherapy, RH: radical hysterectomy, BSO: bilateral salpingooophorectomy, PeN: pelvic lymphadenectomy, PAN: paraaortic lymphadenectomy, OM: omentectomy, CCRT: concurrent chemoradiotherapy, TP: paclitaxel/cisplatin, TC: paclitaxel/carboplatin, CDDP: cisplatin, CPT11: irinotecan, S-1: Tegafur/Gimeracil/Oteracil, NDP: nedaplatin, GEM: gemcitabine, SD: stable disease, PD: progressive disease, NED: no evidence of disease, AWD: alive with disease, DOD: dead of disease
